# Supplementary material for: Affinities to Oxaliplatin: Vitamins from B Group vs. Nucleobases
Source: MDPI journal article supplement (doi:10.3390/ijms231810567), 2022-09-12
Supplement: s1 [file s1]

# Supplementary Material

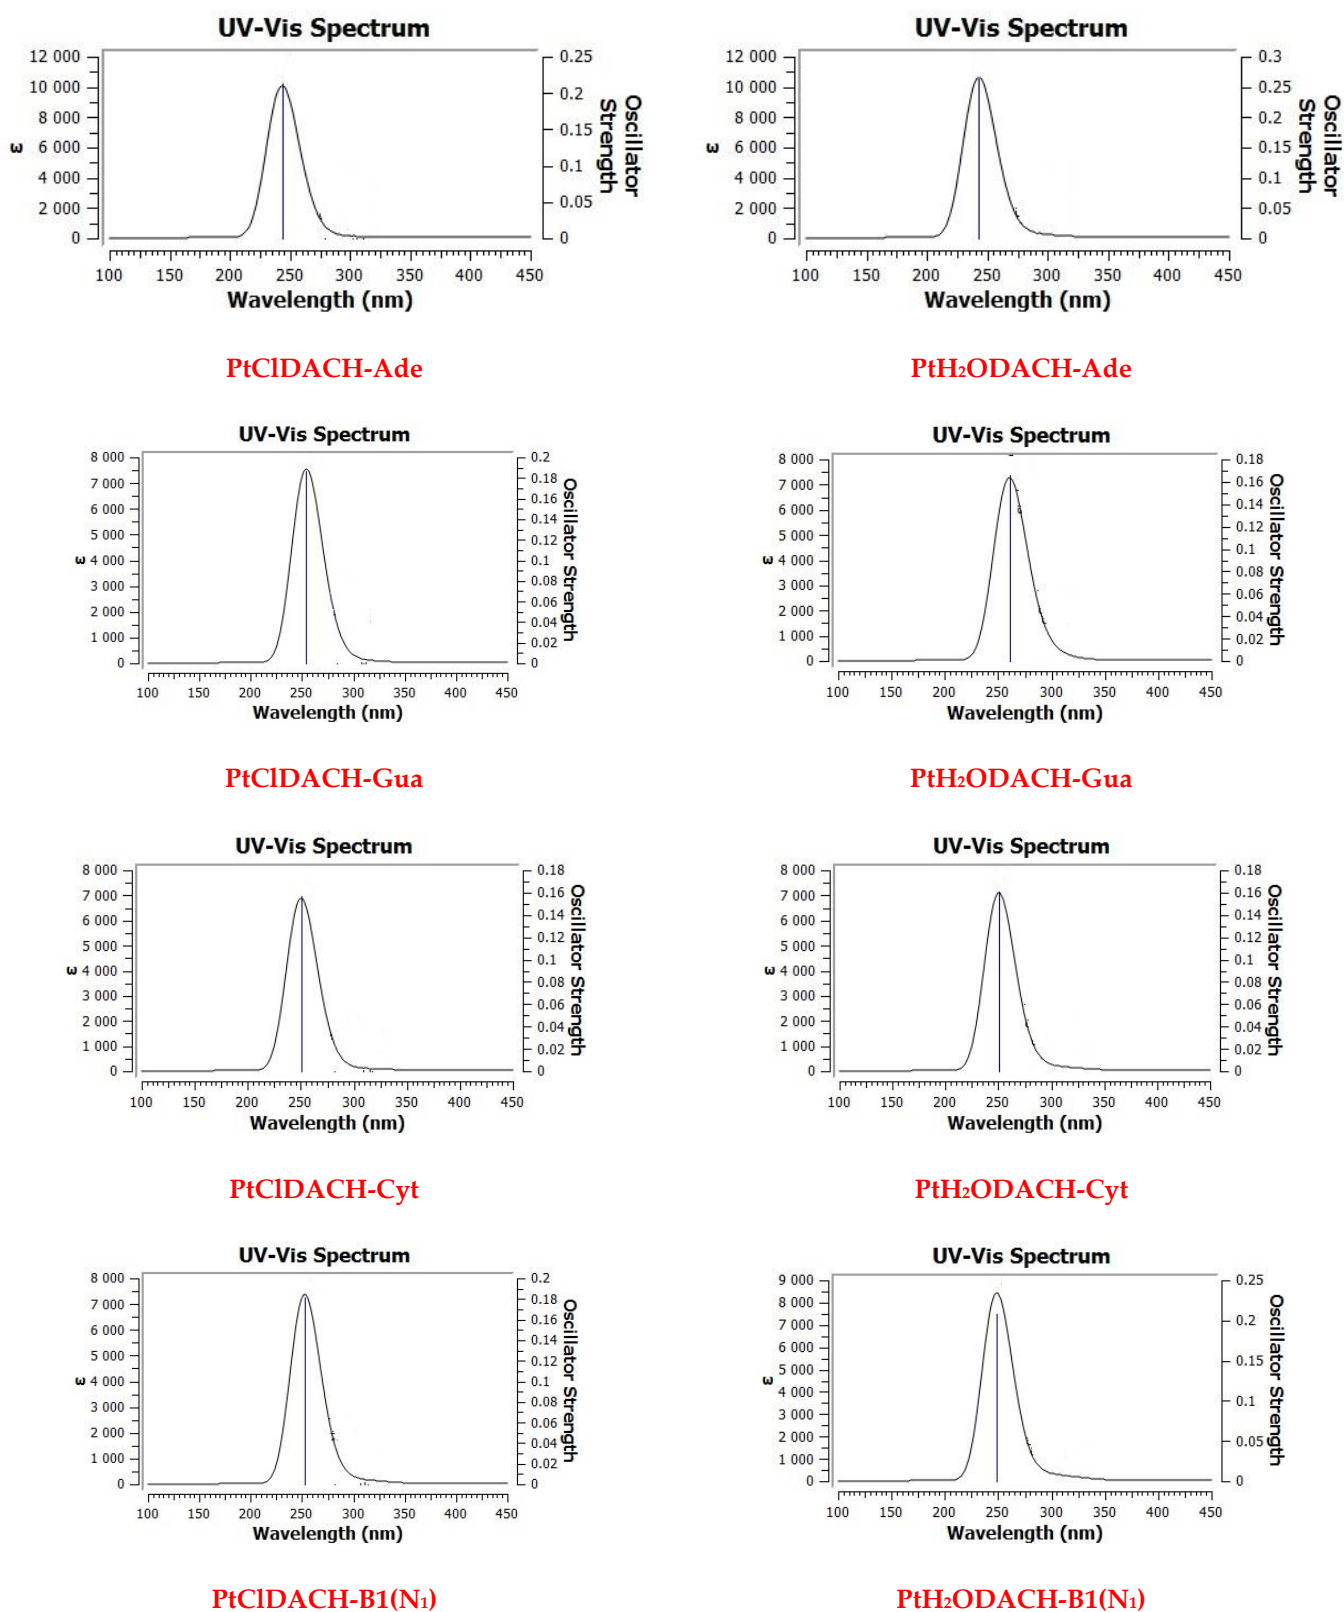

**Figure S1.** Computed (MN15/def2-TZVP level of theory with PCM model and water as a solvent) UV-Vis spectra for selected Oxaliplatin complexes with nucleobases and B vitamins.

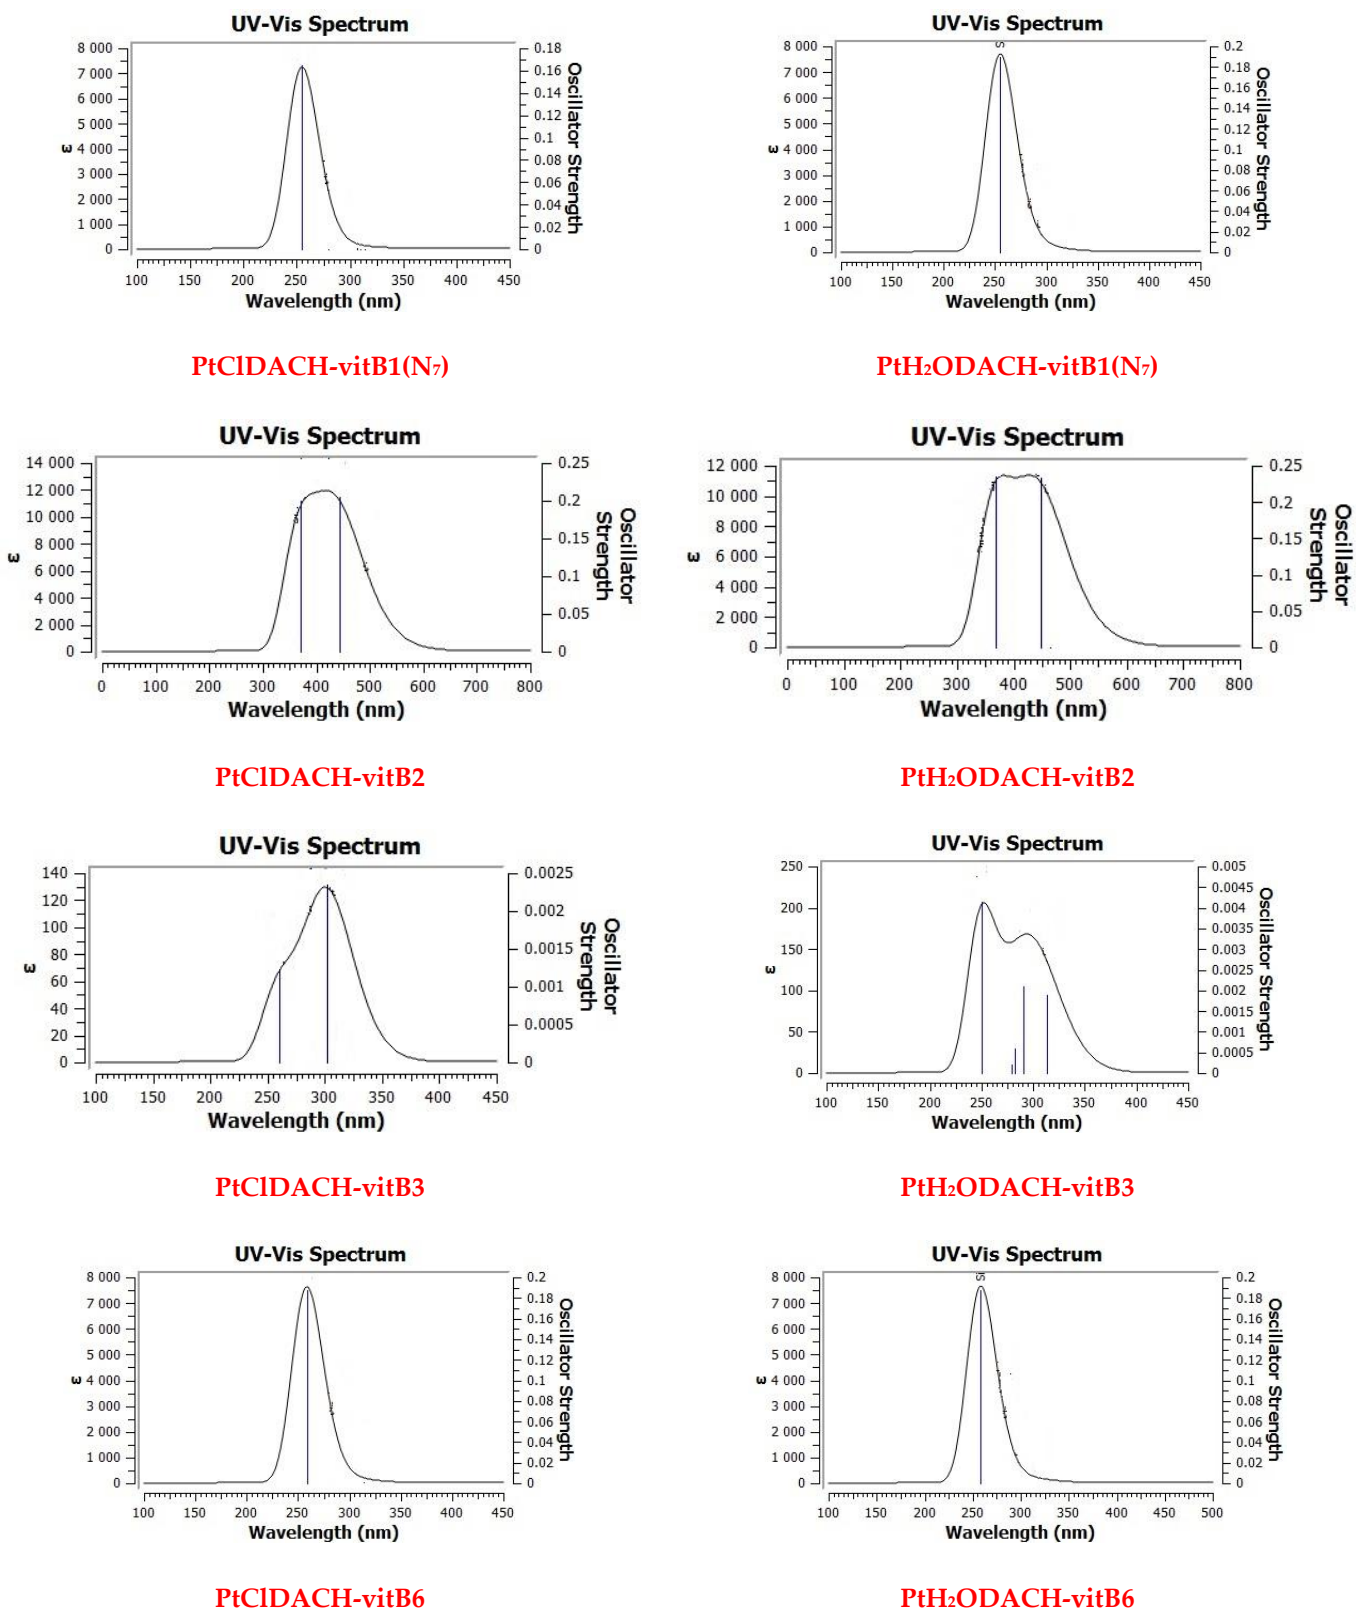

**Figure S1 (Continuation).** Computed (MN15/def2-TZVP level of theory with PCM model and water as a solvent) UV-Vis spectra for selected Oxaliplatin complexes with nucleobases and B vitamins.

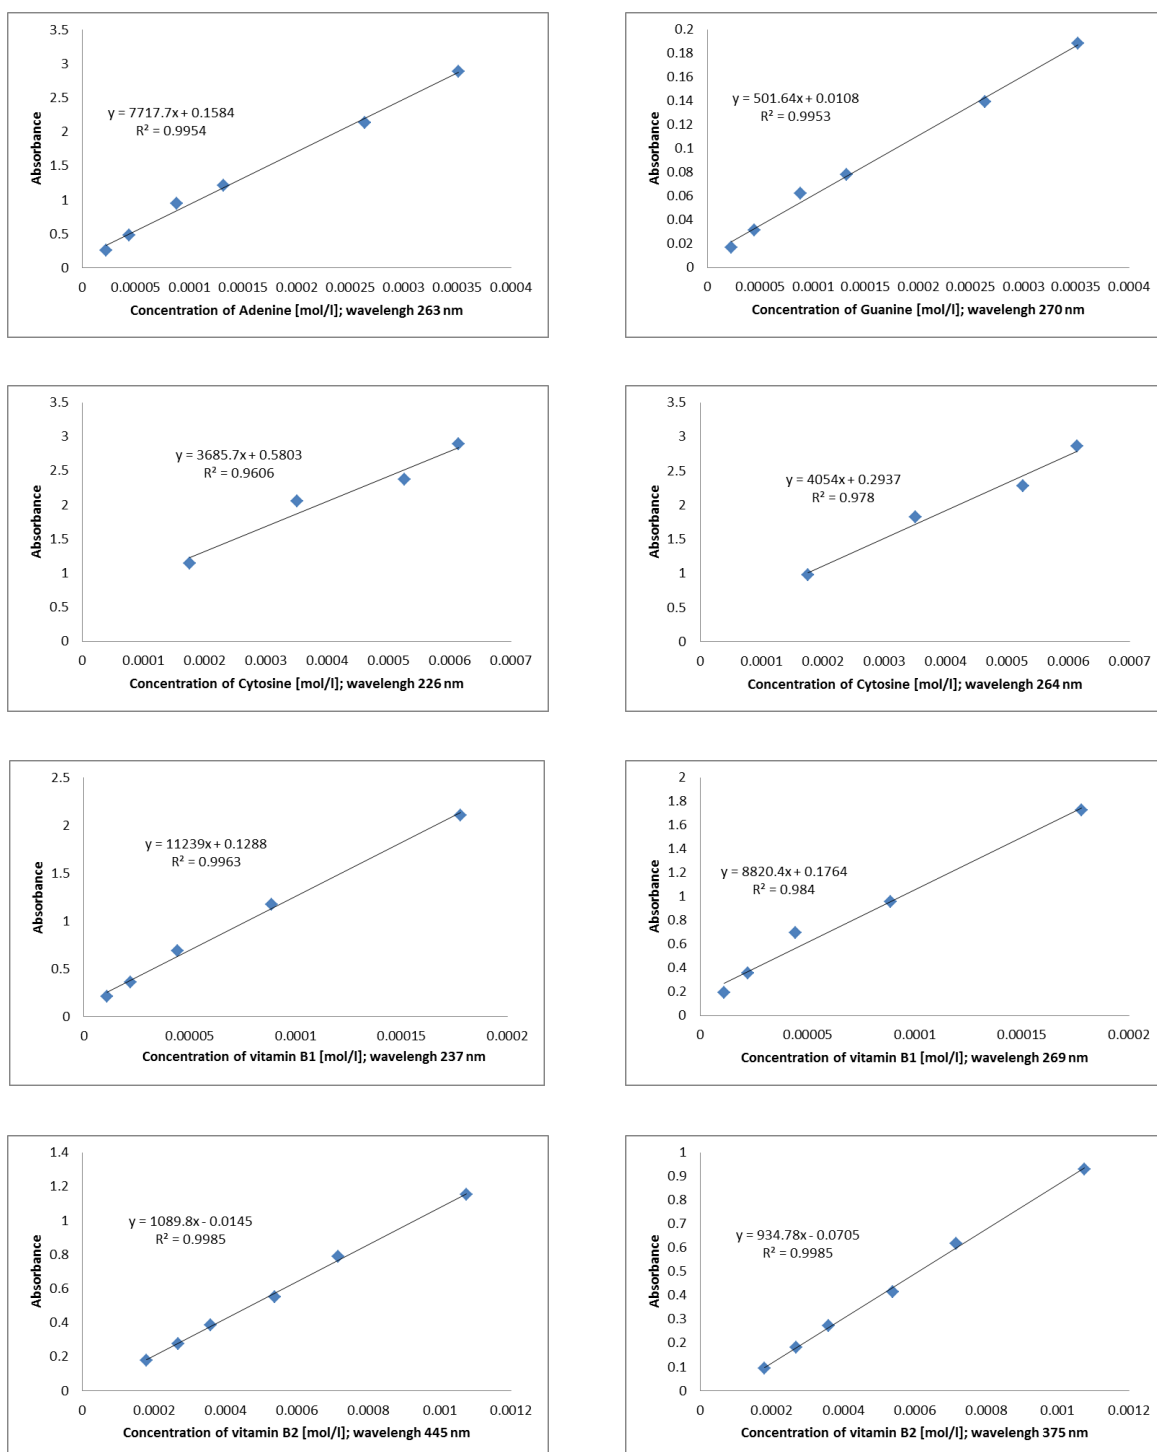

**Figure S2.** A standard curves for nucleobases and vitamins from B group.

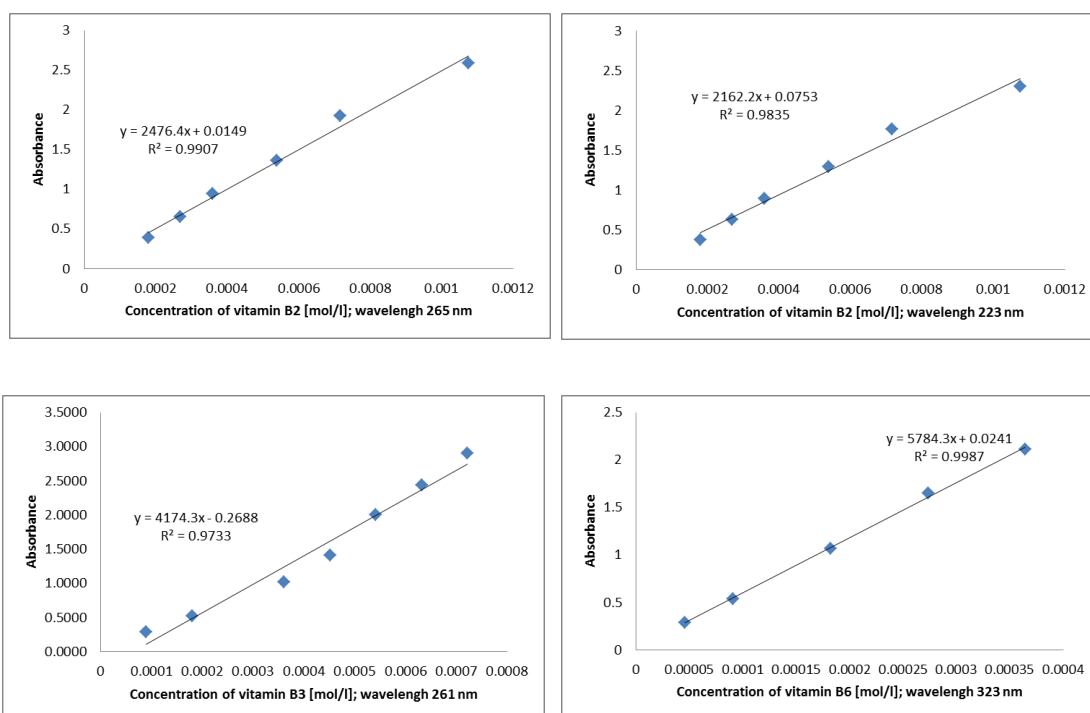

**Figure S2 (Continuation).** A standard curves for nucleobases and vitamins from B group.

**Table S1.** Computed (MN15/def2-TZVP level of theory with PCM) five excitation energies in eV and nm (for singlet-singlet transitions) and oscillator strength (in bracket) for ten selected complexes. The most intensive transitions are marked in red.

| Singlet                         | Excitation energy [eV] | $\lambda$ [nm]         |
|---------------------------------|------------------------|------------------------|
| <b>PtCIDACH-Ade</b>             |                        |                        |
| 1                               | 3.9897                 | 310.76 (0.0008)        |
| 2                               | 4.0580                 | 305.53 (0.0002)        |
| 3                               | 4.1143                 | 301.35 (0.0007)        |
| 4                               | 4.4468                 | 278.81 (0.0003)        |
| 5                               | 5.0904                 | <b>243.56 (0.2483)</b> |
| <b>PtCIDACH-Gua</b>             |                        |                        |
| 1                               | 3.9759                 | 311.84 (0.0008)        |
| 2                               | 4.0077                 | 309.37 (0.0003)        |
| 3                               | 4.0307                 | 307.60 (0.0007)        |
| 4                               | 4.3754                 | 283.36 (0.0004)        |
| 5                               | 4.8771                 | <b>254.22 (0.1861)</b> |
| <b>PtCIDACH-Cyt</b>             |                        |                        |
| 1                               | 3.9056                 | 317.45 (0.0005)        |
| 2                               | 3.9386                 | 314.79 (0.0006)        |
| 3                               | 4.0123                 | 309.01 (0.0007)        |
| 4                               | 4.3926                 | 282.26 (0.0002)        |
| 5                               | 4.9527                 | <b>250.34 (0.1697)</b> |
| <b>PtH<sub>2</sub>ODACH-Ade</b> |                        |                        |
| 1                               | 4.0211                 | 308.34 (0.0010)        |
| 2                               | 4.2529                 | 291.53 (0.0010)        |
| 3                               | 4.2714                 | 290.27 (0.0027)        |
| 4                               | 4.4684                 | 277.47 (0.0003)        |
| 5                               | 5.1011                 | <b>243.06 (0.2614)</b> |
| <b>PtH<sub>2</sub>ODACH-Gua</b> |                        |                        |
| 1                               | 4.0265                 | 307.92 (0.0013)        |
| 2                               | 4.1964                 | 295.45 (0.0036)        |
| 3                               | 4.2504                 | 291.70 (0.0001)        |
| 4                               | 4.5507                 | 272.45 (0.0005)        |
| 5                               | 4.7595                 | <b>260.50 (0.1784)</b> |
| <b>PtH<sub>2</sub>ODACH-Cyt</b> |                        |                        |
| 1                               | 3.9082                 | 317.24 (0.0014)        |
| 2                               | 4.0883                 | 303.26 (0.0018)        |
| 3                               | 4.3372                 | 285.86 (0.0006)        |
| 4                               | 4.4406                 | 279.21 (0.0005)        |
| 5                               | 4.9486                 | <b>250.54 (0.1747)</b> |
